# Supplementary material for: SIRT1 inhibits mitochondrial hyperfusion associated mito-bulb formation to sensitize oral cancer cells for apoptosis in a mtROS-dependent signalling pathway
Source: PubMed Central journal article supplement (PMC10638388; doi:10.1038/s41419-023-06232-x), 2023-11-10

Figure 1B

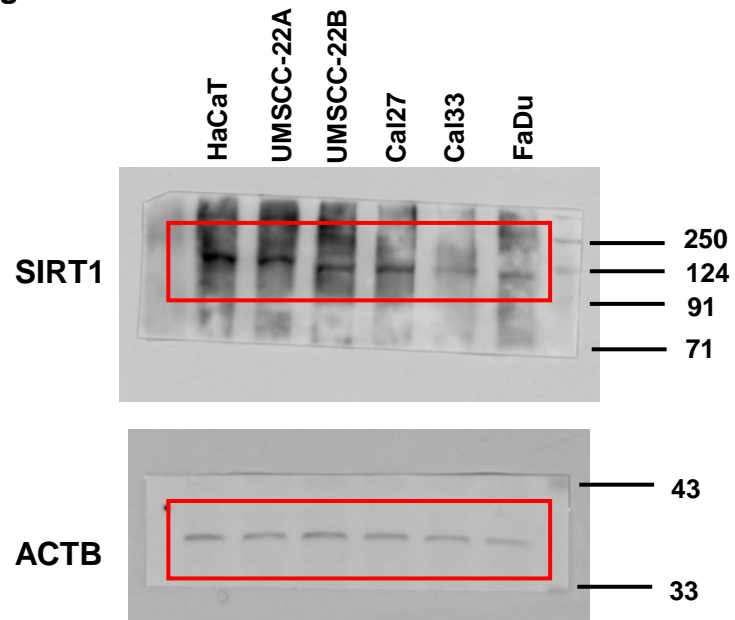

Figure 1E

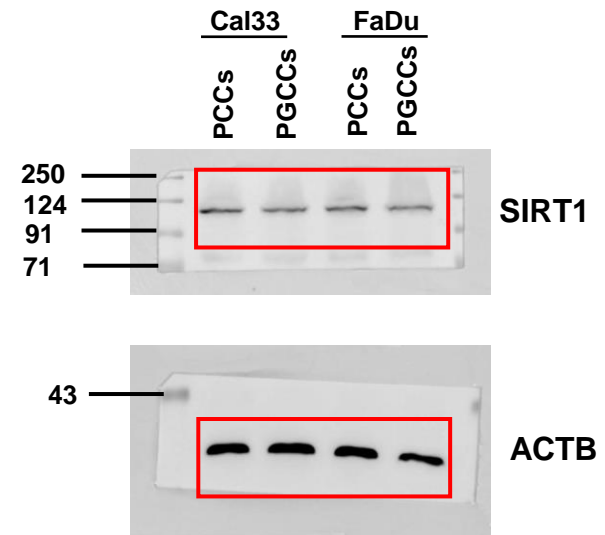

Figure 2A

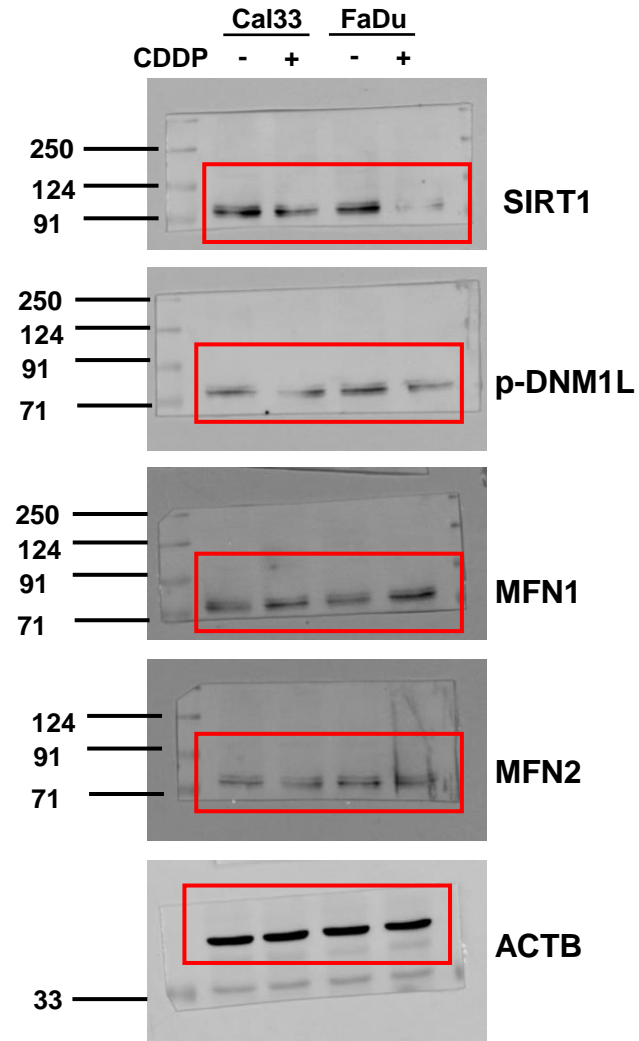

Figure 2Ci

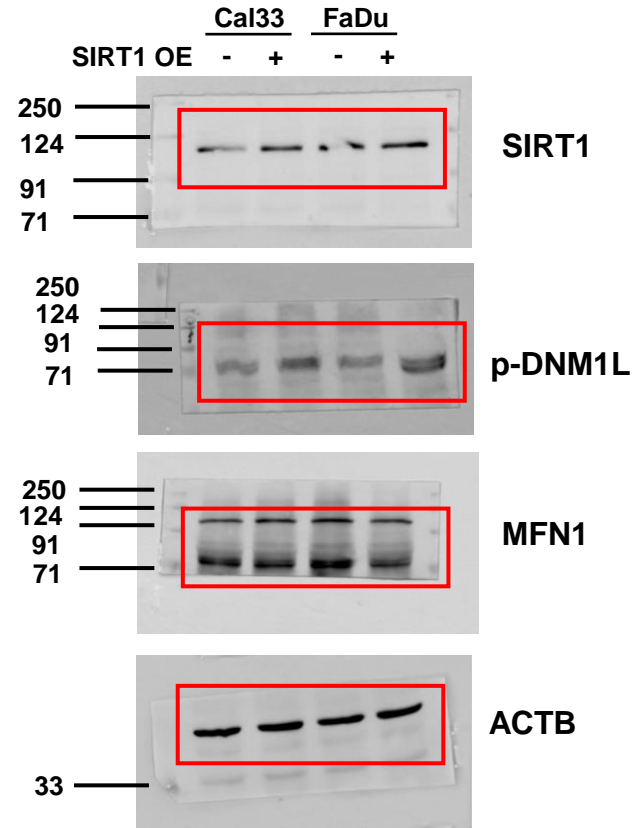

Figure 2Cii

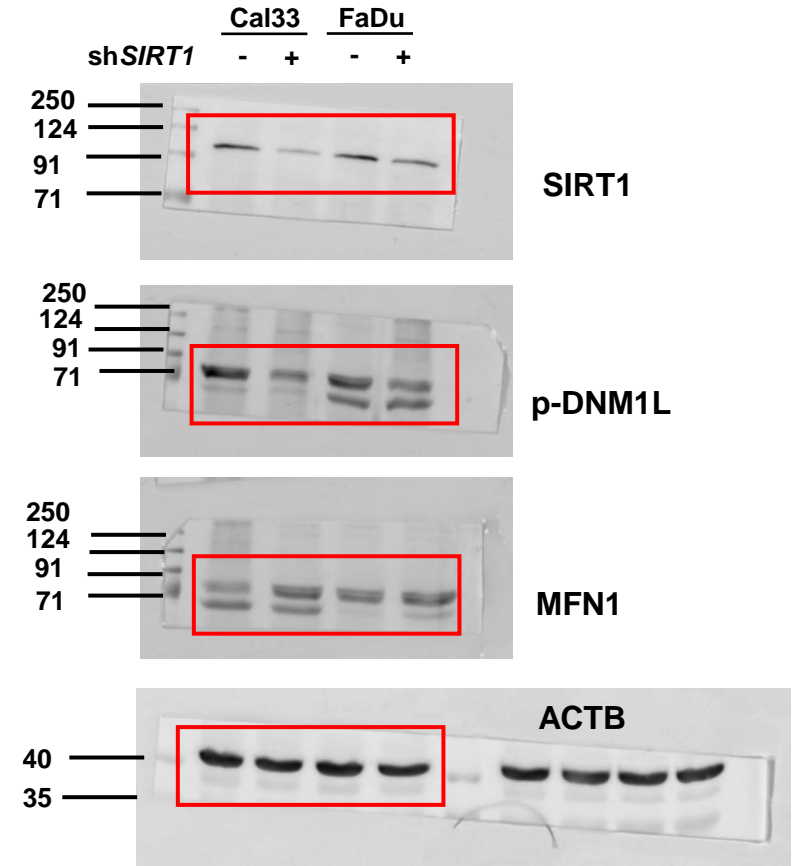

Figure 5A

Cytoplasmic fraction

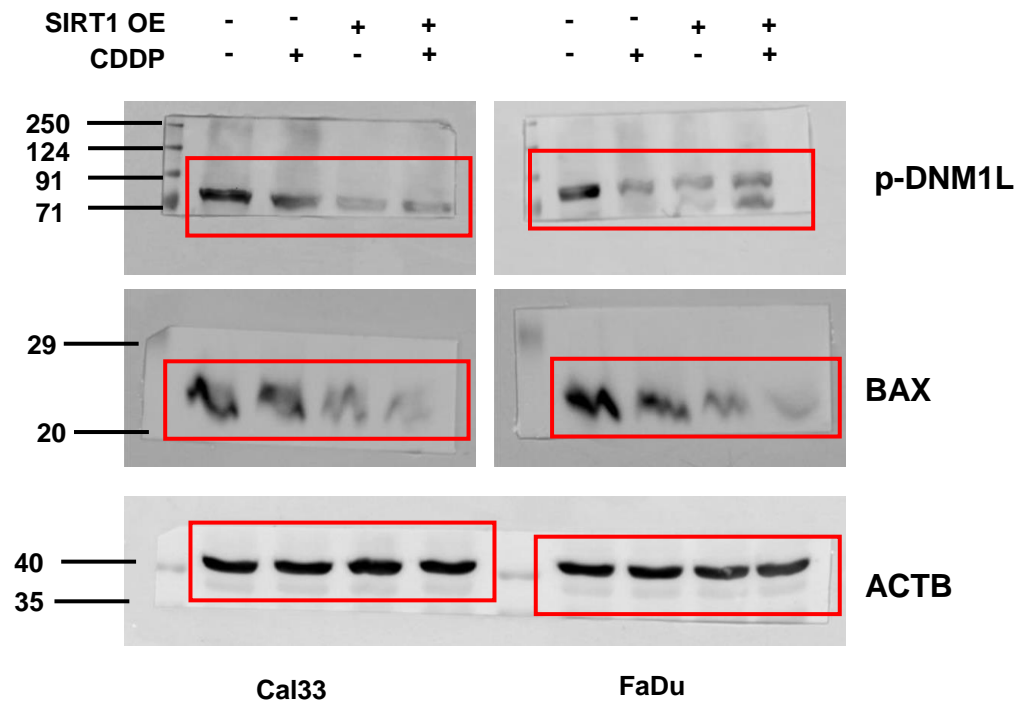

Mitochondrial fraction

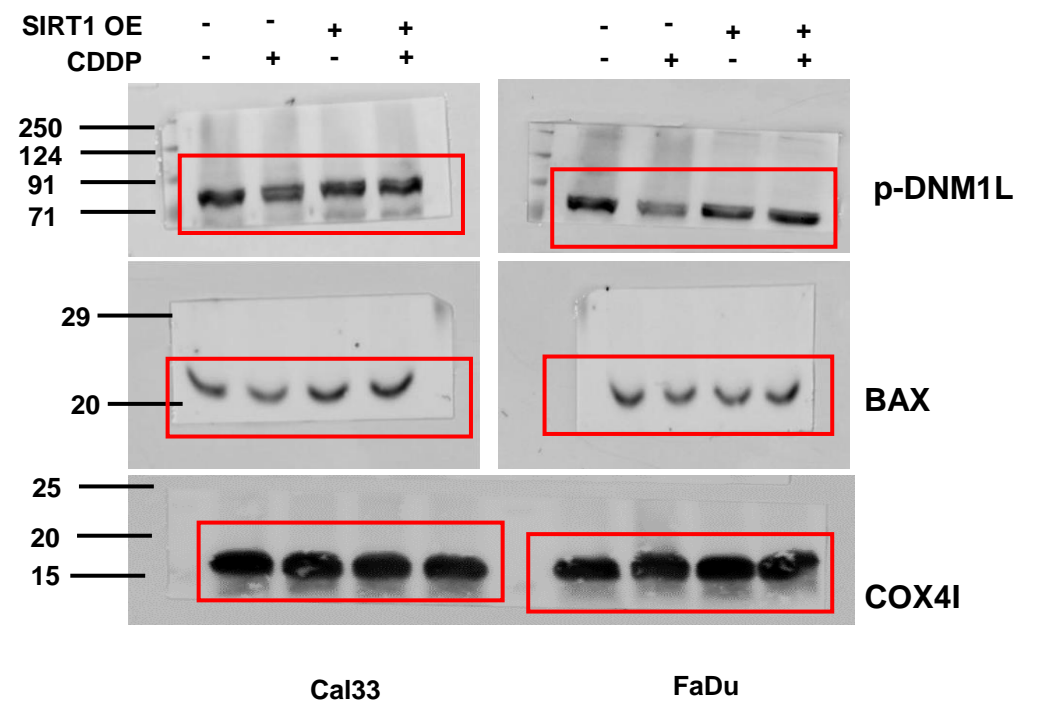

Figure 6A

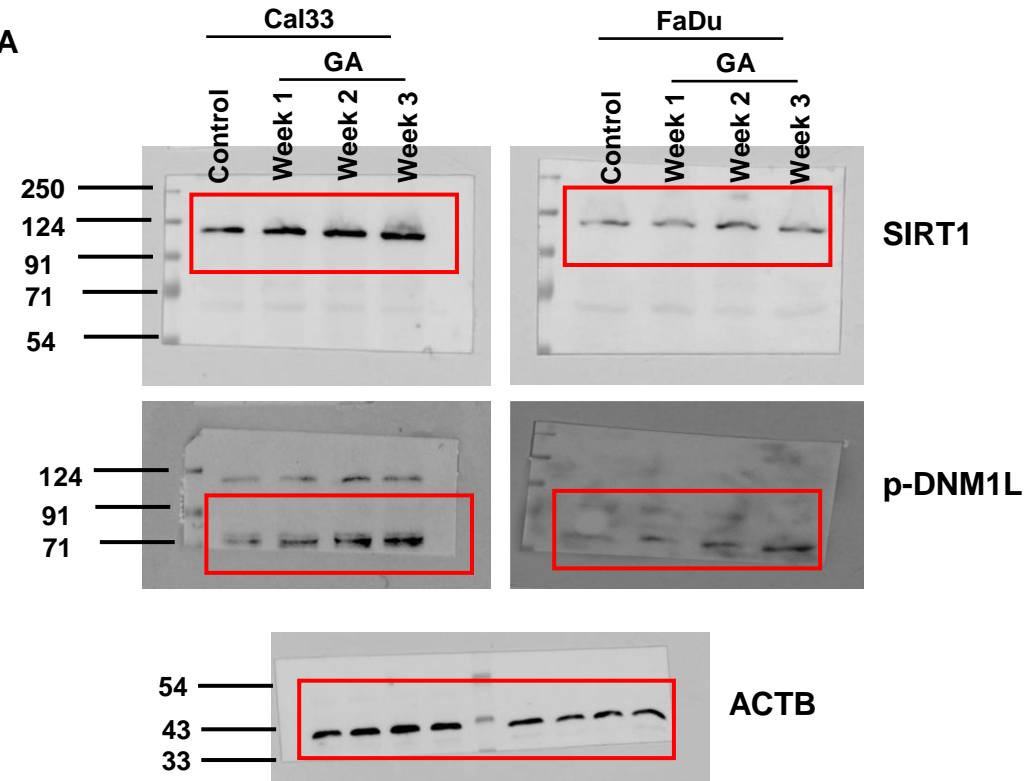

Figure 7A

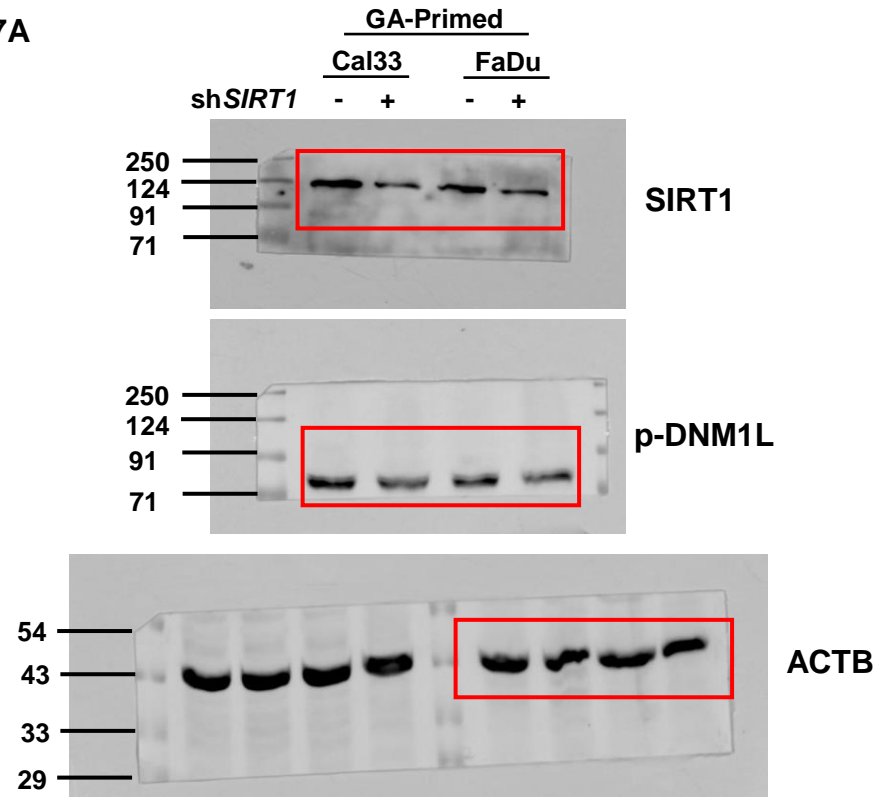

Figure 8A

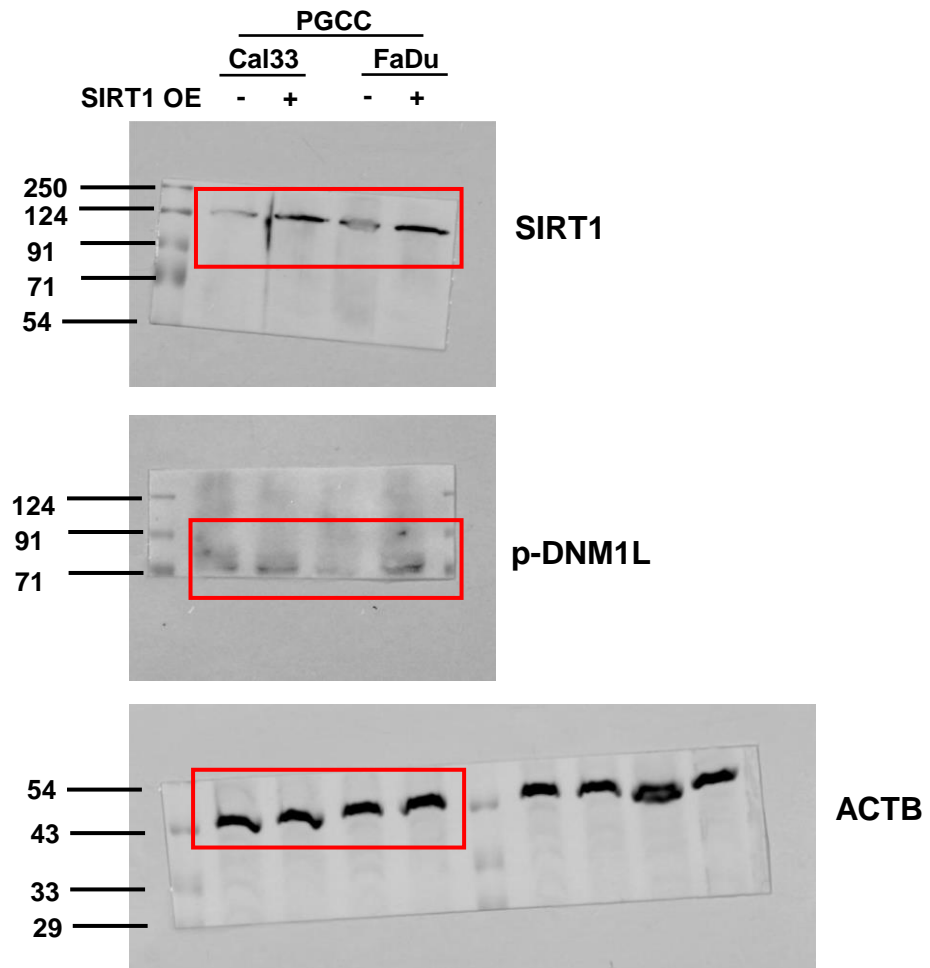

Figure 9A

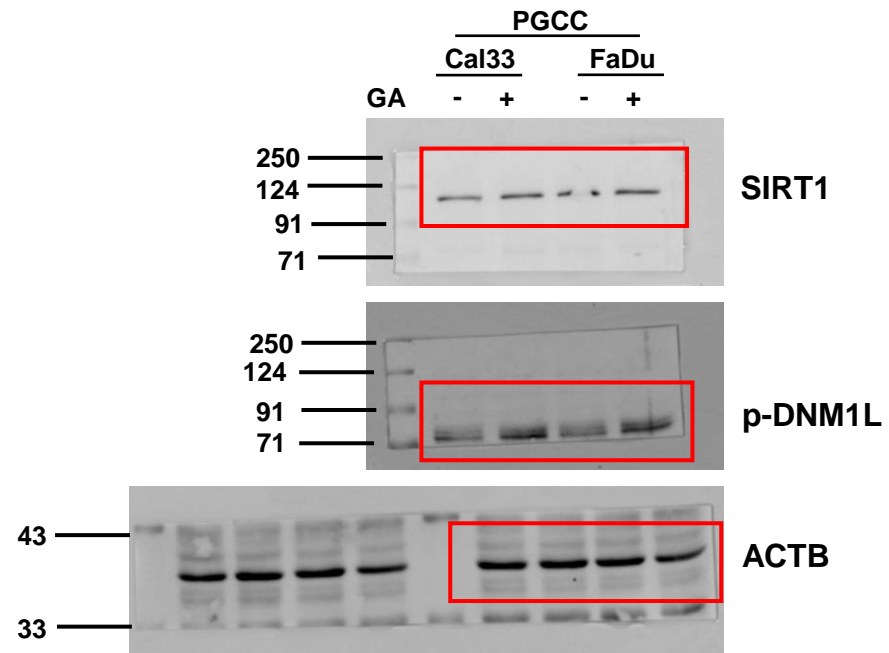





Supplementary figure S4

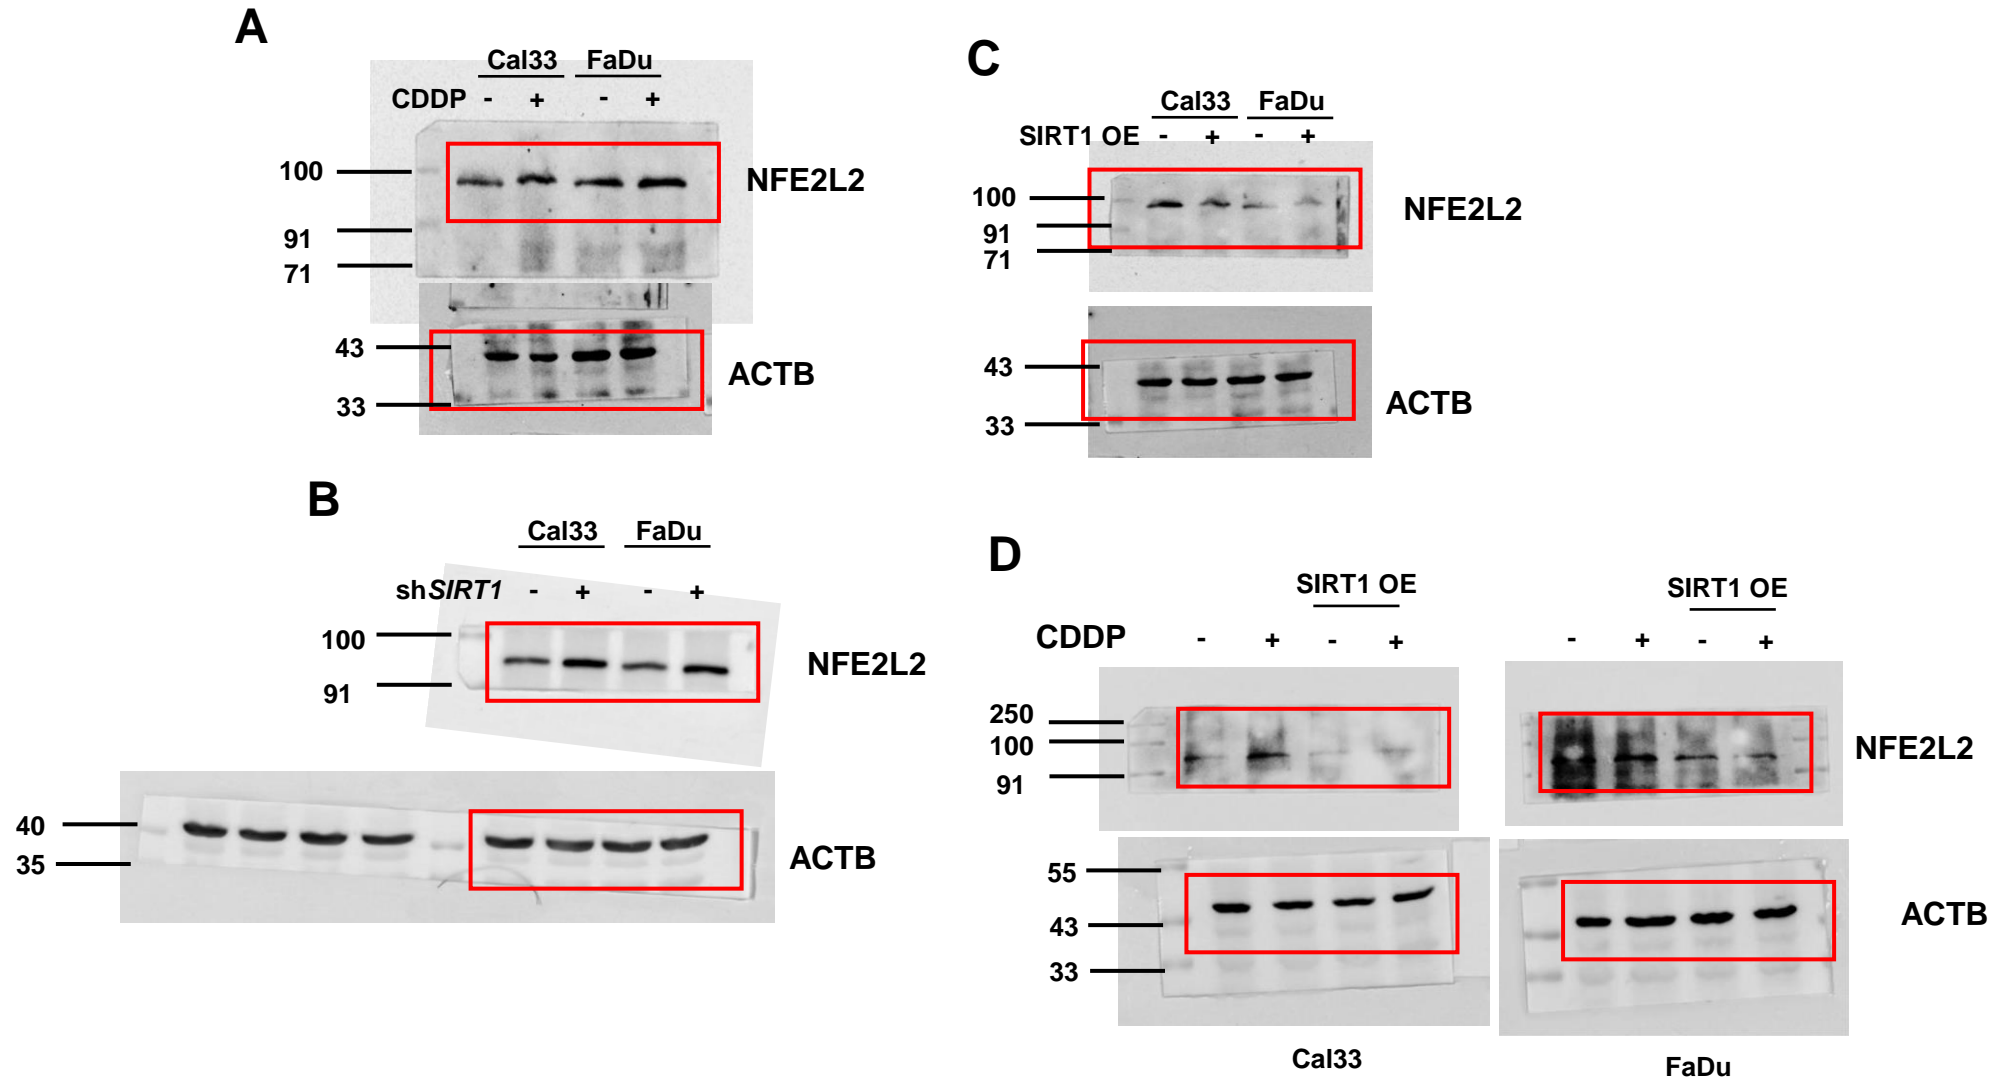

**A**

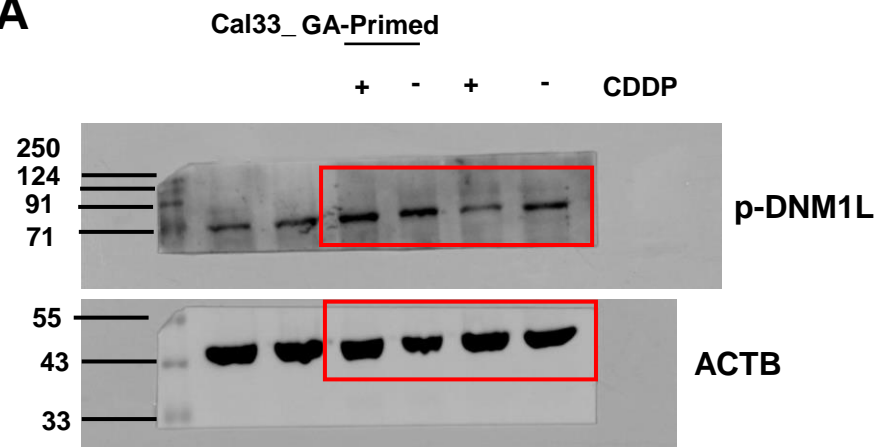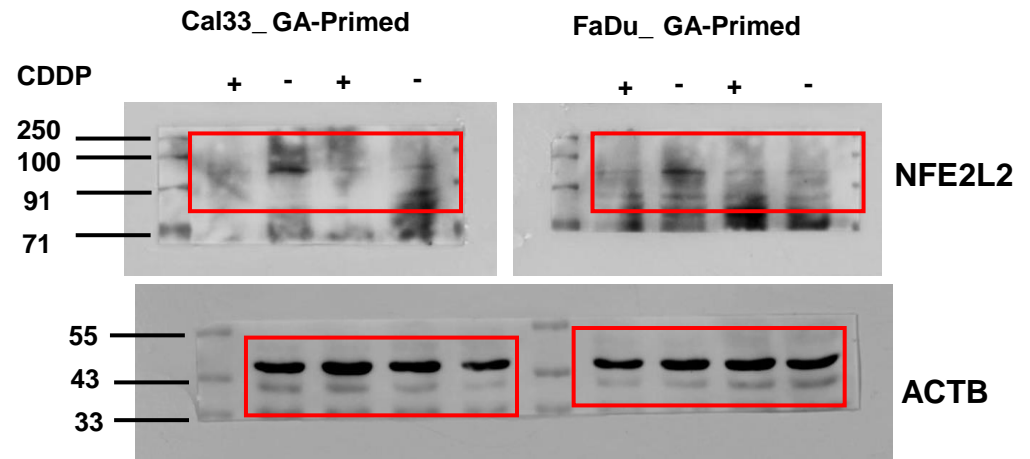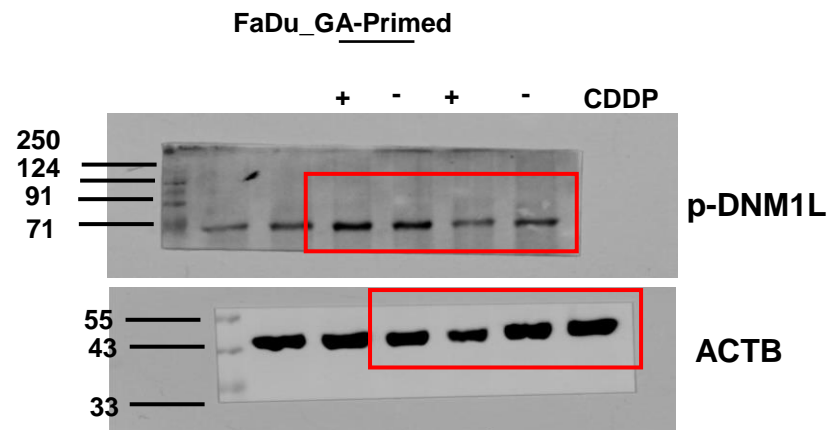

Supplement: 41419_2023_6232_MOESM2_ESM.pdf [file 41419_2023_6232_MOESM2_ESM.pdf]
